# Supplementary material
Source: Springer Nature journal article supplement (https://www.springermedizin.de/resource/supplementary/13012_2013_708_MOESM8_ESM.pdf/9630292)

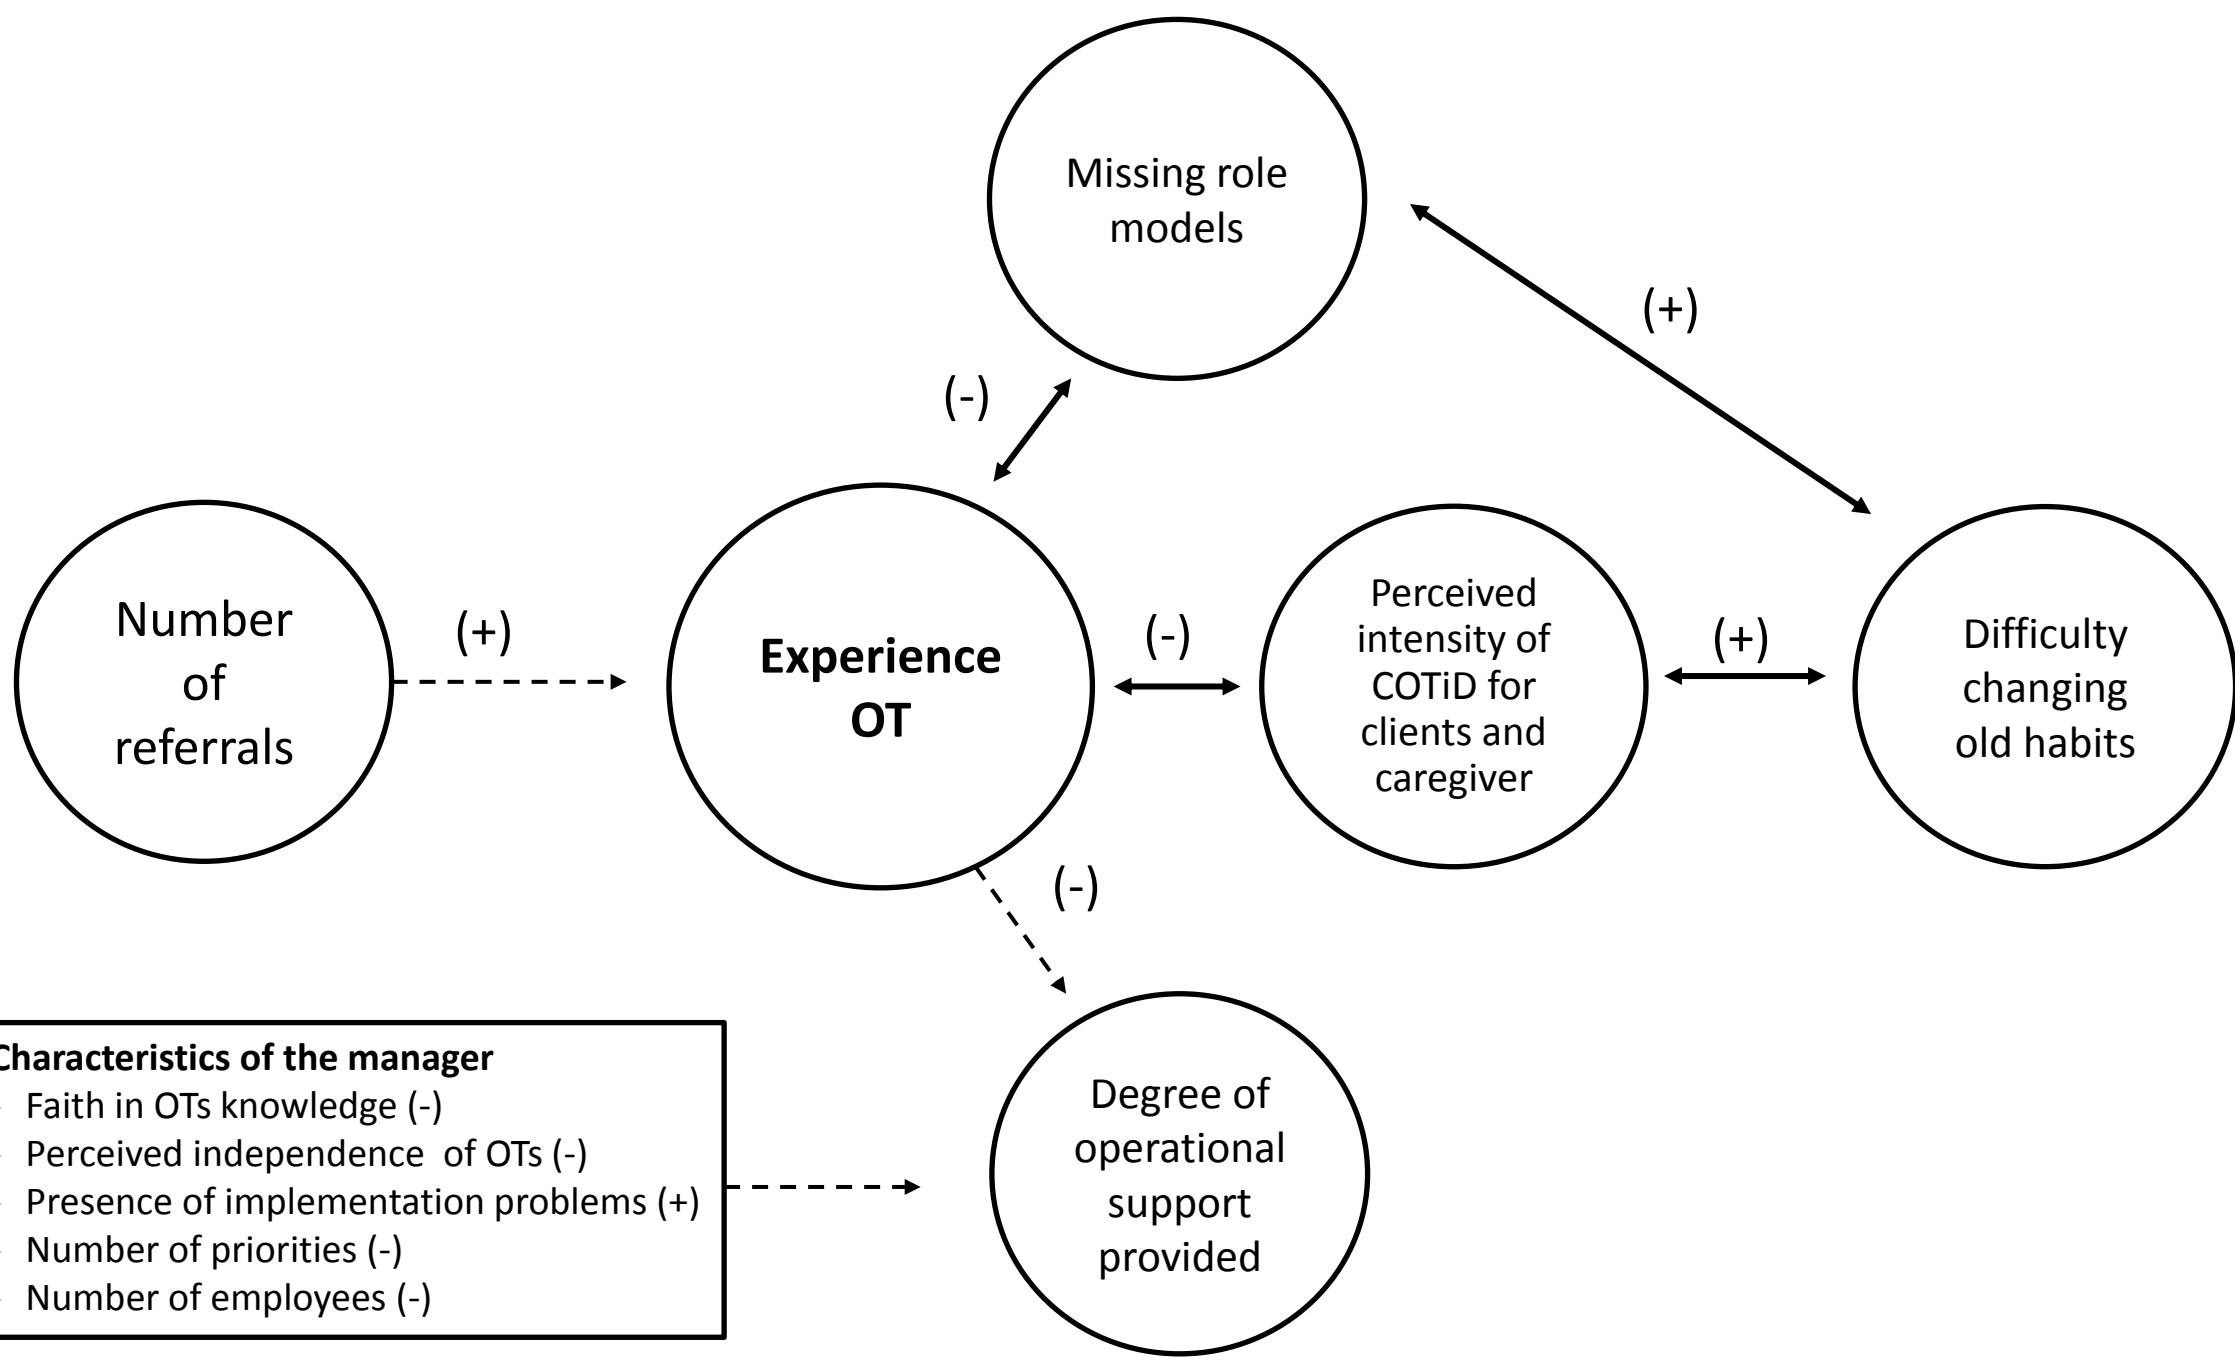

Supplement: MOESM8 [file 9630292]
